# Supplementary material for: Keutschite, Cu 2 AgAsS 4 , a new mineral with a stannite structure from the Uchucchacua polymetallic deposit, Lima Department, Peru
Source: Copernicus journal article supplement (doi:10.5194/ejm-38-1-2026), 2026-01-06
Supplement: Supplementary file [file ejm-38-1-2026-supplement-title-page.pdf › ejm-38-1-2026-supplement-title-page.pdf]

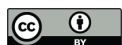

*Supplement of*

**Keutschite,  $\text{Cu}_2\text{AgAsS}_4$ , a new mineral with a stannite structure from the Uchucchacua polymetallic deposit, Lima Department, Peru**

**Dan Topa et al.**

*Correspondence to:* Dan Topa ([dan.topa@nhm.at](mailto:dan.topa@nhm.at))

- [ejm-38-1-2026-supplement-title-page.pdf](#)
- [S1 keutschite.cif](#)
- [S2 keutschite\\_checkcif.pdf](#)

The copyright of individual parts of the supplement might differ from the article licence.
